# Supplementary material for: Comparing Control Intervention Scenarios for Raccoon Rabies in Southern Ontario between 2015 and 2025
Source: MDPI journal article supplement (doi:10.3390/v15020528), 2023-02-14
Supplement: s1 [file s1]

**Table S1.** Raccoon density index (RDI) and capacity of support (K) based on field studies and estimates based on expert opinion (E.O.; T. Buchanan and L. Nituch). K values were calculated by multiplying the RDI value for each land variable by 10.

| Land variable                                                                                                                                                                                                                                                                                                     | RDI (number of raccoons per km <sup>2</sup> ) | Capacity of support (K) used in model landscape | Source                                                                                          |
|-------------------------------------------------------------------------------------------------------------------------------------------------------------------------------------------------------------------------------------------------------------------------------------------------------------------|-----------------------------------------------|-------------------------------------------------|-------------------------------------------------------------------------------------------------|
| Single variable grid cells                                                                                                                                                                                                                                                                                        |                                               |                                                 |                                                                                                 |
| Coniferous forest                                                                                                                                                                                                                                                                                                 | 2.9                                           | 29                                              | [18]                                                                                            |
| Deciduous forest                                                                                                                                                                                                                                                                                                  | 3.4                                           | 34                                              | [20]                                                                                            |
| Elevation above 500 m                                                                                                                                                                                                                                                                                             | 1.0                                           | 10                                              | [18]                                                                                            |
| Exposed land / Barren                                                                                                                                                                                                                                                                                             | 3.4                                           | 34                                              | [20] and E.O.                                                                                   |
| Grassland                                                                                                                                                                                                                                                                                                         | 3.4                                           | 34                                              | [20] and E.O.                                                                                   |
| Mixed forest                                                                                                                                                                                                                                                                                                      | 3.2                                           | 32                                              | Average of densities reported for coniferous and deciduous forests as reported by [18] and [20] |
| Pasture                                                                                                                                                                                                                                                                                                           | 5.1                                           | 51                                              | [19] and E.O.                                                                                   |
| Shrubland                                                                                                                                                                                                                                                                                                         | 3.4                                           | 34                                              | [20] and E.O.                                                                                   |
| Urban                                                                                                                                                                                                                                                                                                             | 18                                            | 180                                             | [18]                                                                                            |
| Peri-urban                                                                                                                                                                                                                                                                                                        | 19                                            | 190                                             | [18]                                                                                            |
| Water                                                                                                                                                                                                                                                                                                             | 0                                             | 0                                               | [18]                                                                                            |
| Wetland                                                                                                                                                                                                                                                                                                           | 3.4                                           | 34                                              | [20] and E.O.                                                                                   |
| Cultivated cropland: Corn                                                                                                                                                                                                                                                                                         | 13.6                                          | 136                                             | [20] and E.O.                                                                                   |
| Other cultivated cropland <ul style="list-style-type: none"> <li>■ Agriculture (undifferentiated)</li> <li>■ Barley</li> <li>■ Greenhouses</li> <li>■ Oats</li> <li>■ Orchards</li> <li>■ Other vegetables</li> <li>■ Rye</li> <li>■ Soybeans</li> <li>■ Tobacco</li> <li>■ Vineyards</li> <li>■ Wheat</li> </ul> | 12.5                                          | 125                                             | [19] and E.O.                                                                                   |
| Variable combinations per grid cell                                                                                                                                                                                                                                                                               |                                               |                                                 |                                                                                                 |
| Corn + deciduous + peri-urban                                                                                                                                                                                                                                                                                     | 30                                            | 300                                             | [19] and E.O.                                                                                   |

|                                          |    |     |               |
|------------------------------------------|----|-----|---------------|
| Corn + deciduous +<br>peri-urban + urban | 30 | 300 | [19] and E.O. |
| Corn + deciduous +<br>urban              | 27 | 270 | [19] and E.O, |
| Deciduous + peri-urban                   | 25 | 250 | [19] and E.O. |
| Deciduous + peri-urban<br>+ urban        | 25 | 250 | [19] and E.O. |
| Deciduous + urban                        | 21 | 210 | [19] and E.O. |
| Corn + deciduous                         | 18 | 180 | [20] and E.O. |
