# Supplementary material for: Comparing Control Intervention Scenarios for Raccoon Rabies in Southern Ontario between 2015 and 2025
Source: Viruses. 2023 Feb 14;15(2):528. doi: 10.3390/v15020528 (PMC9967127; doi:10.3390/v15020528)
Supplement: Supplementary file 1 [file viruses-15-00528-s001.zip]

Archive with 4 entries (4 files):
- File S1.pdf
- File S2.pdf
- File S3.pdf
- Table S1.pdf
